# Supplementary material for: Risk of second primary malignancies in patients with chronic lymphocytic leukemia: a population-based study in the Netherlands, 1989-2019
Source: PubMed Central journal article supplement (PMC9837130; doi:10.1038/s41408-023-00784-z), 2023-01-13

## ONLINE APPENDIX

### Title

Risk of second primary malignancies in patients with chronic lymphocytic leukemia: a population-based study in the Netherlands, 1989-2019

### Short title

Secondary primary malignancies in CLL

### Authors and affiliation

Lina van der Straten,<sup>1-3</sup> Mark-David Levin,<sup>2</sup> Manette A.W. Dinnessen,<sup>1,4</sup> Otto Visser,<sup>5</sup> Eduardus F.M. Posthuma,<sup>6,7</sup> Jeanette K. Doorduijn,<sup>8</sup> Anton W. Langerak,<sup>3</sup> Arnon P. Kater,<sup>4</sup> Avinash G. Dinmohamed<sup>1,4,9,10</sup>

<sup>1</sup>Department of Research and Development, Netherlands Comprehensive Cancer Organisation (IKNL), Utrecht, The Netherlands; <sup>2</sup>Department of Internal Medicine, Albert Schweitzer Hospital, Dordrecht, The Netherlands; <sup>3</sup>Department of Immunology, Erasmus MC, Rotterdam; <sup>4</sup>Amsterdam UMC, University of Amsterdam, Department of Hematology, Cancer Center Amsterdam, Lymphoma and Myeloma Center Amsterdam, Amsterdam, The Netherlands; <sup>5</sup>Department of Registration, Netherlands Comprehensive Cancer Organisation (IKNL), Utrecht, The Netherlands; <sup>6</sup>Department of Internal Medicine, Reinier The Graaf Hospital, Delft, The Netherlands; <sup>7</sup>Department of Hematology, Leiden University Medical Center, Leiden, The Netherlands; <sup>8</sup>Erasmus MC Cancer Institute, Department of Hematology, University Medical Center Rotterdam, Rotterdam, The Netherlands; <sup>9</sup>Erasmus MC, Department of Public Health, University Medical Center Rotterdam, Rotterdam, The Netherlands; <sup>10</sup>Amsterdam UMC, Vrije Universiteit Amsterdam, Department of Hematology, Cancer Center Amsterdam, Amsterdam, The Netherlands

## Supplemental Table 1

**Supplemental Table 1.** Definitions of the subtypes of secondary primary malignancies with corresponding topography and morphology codes as per the International Classification of Diseases for Oncology

| SPM category            | Tumor subtype                          | Topography                                   | Morphology                                                                               |
|-------------------------|----------------------------------------|----------------------------------------------|------------------------------------------------------------------------------------------|
| Oral cavity and pharynx | Tongue carcinoma                       | C02                                          | 8000-8576, 8940-8941, 8980, 8982, 9110, 9990                                             |
|                         | Gum carcinoma                          | C03                                          | 8000-8576, 8940-8941, 8980, 8982, 9110, 9990                                             |
|                         | Floor of the mouth carcinoma           | C04                                          | 8000-8576, 8940-8941, 8980, 8982, 9110, 9990                                             |
|                         | Palate carcinoma                       | C05.0, C05.8-9                               | 8000-8576, 8940-8941, 8980, 8982, 9110, 9990                                             |
|                         | Oral cavity, other/NOS                 | C00.3-5, C06                                 | 8000-8576, 8940-8941, 8980, 8982, 9110, 9990                                             |
|                         | Oropharynx carcinoma                   | C01, C05.1-2, C09, C10.0, C10.2-4, C10.8-9   | 8000-8576, 8940-8941, 8980, 8982, 9110, 9990                                             |
|                         | Nasopharynx carcinoma                  | C11                                          | 8000-8576, 8940-8941, 8980, 8982, 9110, 9990                                             |
|                         | Hypopharynx carcinoma                  | C12-13                                       | 8000-8576, 8940-8941, 8980, 8982, 9110, 9990                                             |
|                         | Mouth and pharynx, other/NOS           | C14.0, C14.2, C14.9                          | 8000-8576, 8940-8941, 8980, 8982, 9110, 9990                                             |
|                         | Parotid gland carcinoma                | C07                                          | 8000-8576, 8940-8941, 8980, 8982, 9110, 9990                                             |
| Other salivary glands   | C08                                    | 8000-8576, 8940-8941, 8980, 8982, 9110, 9990 |                                                                                          |
| Esophagus               | Cervical oesophageal carcinoma         | C15.0                                        | 8000-8149, 8154, 8158-8230, 8243-8246, 8250-8576, 8980, 8982, 9110, 9990                 |
|                         | Oesophageal carcinoma (excl. cervical) | C15.1-9                                      | 8000-8149, 8154, 8158-8230, 8243-8246, 8250-8576, 8980, 8982, 9110, 9990                 |
| Stomach                 | Invasive cardia carcinoma              | C16.0                                        | 8000-8149, 8154, 8158-8230, 8243-8246, 8250-8576, 8980, 8982, 9110, 9990                 |
|                         | Invasive stomach carcinoma             | C16.1-9                                      | 8000-8149, 8154, 8158-8230, 8243-8246, 8250-8576, 8980, 8982, 9110, 9990                 |
| Colon and rectum        | Colon carcinoma                        | C18.0, C18.2-9                               | 8000-8231, 8243-8246, 8250-8576, 8980, 8982, 9110, 9990                                  |
|                         | Appendix carcinoma                     | C18.1                                        | 8000-8231, 8243-8246, 8250-8576, 8980, 8982, 9110, 9990                                  |
|                         | Rectum carcinoma                       | C20                                          | 8000-8231, 8243-8246, 8250-8576, 8980, 8982, 9110, 9990                                  |
|                         | Rectosigmoid carcinoma                 | C19                                          | 8000-8231, 8243-8246, 8250-8576, 8980, 8982, 9110, 9990                                  |
| Pancreas                | Exocrine pancreatic carcinoma          | C25                                          | 8012, 8014-8040, 8045-8148, 8154, 8160-8231, 8243-8245, 8250-8573, 8575-8576, 8980, 8982 |
|                         | Pancreatic carcinoma                   | C25.0-3, C25.5-9                             | 8000-8011, 9990                                                                          |

**Supplemental Table 1 (continued)**

| <b>SPM category</b> | <b>Tumor subtype</b>                         | <b>Topography</b> | <b>Morphology</b>                                                                        |
|---------------------|----------------------------------------------|-------------------|------------------------------------------------------------------------------------------|
| Pancreas            | Exocrine pancreatic carcinoma                | C25               | 8012, 8014-8040, 8045-8148, 8154, 8160-8231, 8243-8245, 8250-8573, 8575-8576, 8980, 8982 |
|                     | Pancreatic carcinoma                         | C25.0-3, C25.5-9  | 8000-8011, 9990                                                                          |
| Larynx              | Supraglottic carcinoma                       | C32.1, C10.1      | 8000-8576, 8940-8941, 8980, 8982, 9110, 9990                                             |
|                     | Glottic carcinoma                            | C32.0             | 8000-8576, 8940-8941, 8980, 8982, 9110, 9990                                             |
|                     | Subglottic carcinoma                         | C32.2             | 8000-8576, 8940-8941, 8980, 8982, 9110, 9990                                             |
|                     | Other/unspecified laryngeal carcinoma        | C32.8-9           | 8000-8576, 8940-8941, 8980, 8982, 9110, 9990                                             |
| Lung and bronchus   | Non-small-cell lung carcinoma                | C34               | 8010-8020, 8022-8035, 8046-8230, 8243-8246, 8250-8576, 8972, 8980-8982, 9110             |
|                     | Small-cell lung carcinoma                    | C34               | 8002, 8021, 8041-8045                                                                    |
|                     | Carcinoid of the lung                        | C34               | 8240-8242, 8248-8249                                                                     |
|                     | Other/unspecified lung cancer                | C34               | 8000-8001, 8003-8005, 9990, 8720-8790                                                    |
|                     | Pleuropulmonary blastoma                     | C34               | 8973                                                                                     |
| Melanoma skin       | Melanoma of the skin and lip                 | C00.0, C00.1, C44 | 8720-8790                                                                                |
|                     | Melanoma of the vulva                        | C51               | 8720-8790                                                                                |
|                     | Melanoma of the penis                        | C60               | 8720-8790                                                                                |
|                     | Melanoma of the scrotum                      | C63.2             | 8720-8790                                                                                |
|                     | Melanoma of a primary unknown site           | C80               | 8720-8790                                                                                |
| Squamous cell skin  | Squamous cell carcinoma of the eyelid        | C44.1             | 8000-8012, 8014-8035, 8050-8084, 8560, 8575, 8980, 9990                                  |
|                     | Squamous cell carcinoma and other skin sites | C44.5-9, C63.2    | 8000-8012, 8014-8035, 8050-8084, 8560, 8575, 8980, 9990                                  |
|                     | Squamous cell carcinoma head and neck        | C44.0, C44.2-4    | 8000-8012, 8014-8035, 8050-8084, 8560, 8575, 8980, 9990                                  |
| Breast              | Invasive breast cancer carcinoma             | C50               | 8000-8576, 8980, 8982, 8983, 9110, 9990                                                  |
| Endometrium         | Endometrium carcinoma                        | C54-55            | 8000-8576, 8950-8951, 8980-8982, 9110, 9990                                              |

**Supplemental Table 1 (continued)**

| <b>SPM category</b>        | <b>Tumor subtype</b>                                       | <b>Topography</b>          | <b>Morphology</b>                                                                                                                                         |
|----------------------------|------------------------------------------------------------|----------------------------|-----------------------------------------------------------------------------------------------------------------------------------------------------------|
| Ovary                      | Borderline ovarian carcinoma                               | C56, C48.1-2, C57          | 8000-8576, 9000-9015, 9110                                                                                                                                |
|                            | Borderline ovarian carcinoma                               | C56                        | 8460                                                                                                                                                      |
|                            | Borderline ovarian carcinoma                               | C56                        | 8442, 8451, 8462, 8463, 8472, 8473                                                                                                                        |
|                            | Non-epithelial ovarian tumors<br>borderline                | C56, C48.1-2, C57          | 8590-8670, 9060-9105                                                                                                                                      |
|                            | Non-invasive tuba carcinoma                                | C57.0                      | 8000-8576, 8930-8934, 8950-8951, 8980, 8982, 9000-9015, 9110, 9990                                                                                        |
|                            | Epithelial ovarian carcinoma                               | C56                        | 8000-8239, 8250-8441, 8450, 8452-8461, 8470-8471, 8474, 8480-8576, 8930-8934, 8950-8951, 8980, 8982, 9000-9015, 9110, 9990                                |
|                            | Extra-ovarian carcinoma                                    | C48.1-2                    | 8000, 8010-8149, 8154, 8158-8231, 8250-8576, 8950-8951, 8980, 8982, 9110                                                                                  |
|                            | Non-epithelial ovarian cancer                              | C56                        | 8240-8249, 8590-8670, 9060-9105, 8800-8831, 8840-8850, 8852-8921, 8935, 8960-8973, 8990-8991, 9040-9044, 9120-9133, 9150-9261, 9364, 9380-9514, 9530-9581 |
| Prostate                   | Prostate carcinoma                                         | C61                        | 8000-8576, 8980, 8982, 9110, 9990                                                                                                                         |
| Urinary bladder            | Muscle-invasive bladder<br>carcinoma                       | C67.0-6, C67.8-9           | 8000-8576, 8980, 8982, 9110, 9990                                                                                                                         |
| Kidney and renal<br>pelvis | Kidney carcinoma                                           | C64                        | 8000-8576, 8980, 8982, 9110, 9990                                                                                                                         |
|                            | Carcinoma of the renal pelvis<br>carcinoma                 | C65                        | 8000-8576, 8980, 8982, 9110, 9990                                                                                                                         |
| Brain                      | Malign brain tumors,<br>neuroepithelial                    | C71, C72.2-3, C75.1, C75.3 | 9380-9420, 9422-9514                                                                                                                                      |
|                            | Malign brain tumors,<br>unspecified                        | C71, C72.2-3               | 8000-8005, 9990                                                                                                                                           |
| Thyroid                    | Papillary and follicular<br>carcinoma of the thyroid gland | C73                        | 8010, 8046, 8140, 8201, 8260, 8290, 8310, 8330, 8331, 8332, 8335, 8337, 8339, 8340, 8341, 8342, 8343, 8344, 8350, 8430, 8450, 8481, 8504, 8560, 8570      |
|                            | Medullary carcinoma of the<br>thyroid gland                | C73                        | 8240, 8246, 8345-8347, 8510-8511                                                                                                                          |
|                            | Anaplastic carcinoma of the<br>thyroid gland               | C73                        | 8012, 8020, 8021, 8022, 8030, 8031, 8032, 8033, 8035, 8041, 8980                                                                                          |
|                            | Squamous cell carcinoma of<br>the thyroid gland            | C73                        | 8051-8084                                                                                                                                                 |
|                            | Other/unspecified carcinoma of<br>the thyroid gland        | C73                        | 8000-8005, 9990, 8588, 8589                                                                                                                               |

## Supplemental Table 1 (continued)

|                     |                                                                 |                                            |                                                                                                                                                                       |
|---------------------|-----------------------------------------------------------------|--------------------------------------------|-----------------------------------------------------------------------------------------------------------------------------------------------------------------------|
|                     | Soft tissue sarcoma of the head and neck                        | C44.0-4, C47.0, C49.0, C00-14, C30-32, C73 | 8710-8711, 8714, 8800-8831, 8840-8850, 8852-8921, 8935, 8963-8964, 8990-8991, 9040-9045, 9137, 9150-9170, 9180-9261, 9364-9365, 9540-9581                             |
|                     | Soft tissue sarcoma of the head and neck                        | C47.0, C49.0                               | 8000-8005, 8980-8982, 9990                                                                                                                                            |
|                     | Soft tissue sarcoma of the head and neck                        | C44.0-4, C49.0, C00-14, C30-32, C73        | 9120-9133                                                                                                                                                             |
|                     | Soft tissue sarcoma of the extremities                          | C44.6-7, C47.1-2, C49.1-2                  | 8710-8711, 8714, 8800-8831, 8840-8850, 8852-8921, 8935, 8963-8964, 8990-8991, 9040-9044, 9137, 9150-9170, 9180-9261, 9364-9365, 9540-9581                             |
|                     | Soft tissue sarcoma of the extremities                          | C47.1-2, C49.1-2                           | 8000-8005, 8980-8982, 9990                                                                                                                                            |
|                     | Soft tissue sarcoma of the extremities                          | C44.6-7, C49.1-2                           | 9120-9133                                                                                                                                                             |
| Soft-tissue sarcoma | Soft tissue sarcoma of the thorax                               | C47.3, C49.3, C38.1-3, C38.8               | 8000-8005, 8710-8711, 8714, 8800-8831, 8840-8850, 8852-8921, 8935, 8963-8964, 8980-8982, 8990-8991, 9040-9044, 9137, 9150-9170, 9180-9261, 9364-9365, 9540-9581, 9990 |
|                     | Soft tissue sarcoma of the thorax                               | C38.4                                      | 8710-8711, 8714, 8800-8831, 8840-8850, 8852-8921, 8935, 8963-8964, 8980-8982, 8990-8991, 9040-9044, 9120-9133, 9137, 9150-9170, 9180-9261, 9364-9365, 9540-9581       |
|                     | Soft tissue sarcoma of the thorax                               | C37, C39                                   | 8710-8711, 8714, 8800-8831, 8840-8850, 8852-8921, 8935, 8963-8964, 8990-8991, 9040-9044, 9120-9133, 9137, 9150-9170, 9180-9261, 9364-9365, 9540-9581                  |
|                     | Soft tissue sarcoma of the thorax                               | C44.5, C49.3, C38.1-3, C38.8               | 9120-9133                                                                                                                                                             |
|                     | Soft tissue sarcoma of the thorax                               | C38.0                                      | 8000, 8710-8711, 8714, 8800-8831, 8840-8850, 8852-8921, 8935, 8963-8964, 8990-8991, 9040-9044, 9120-9133, 9137, 9150-9170, 9180-9261, 9364-9365, 9540-9581, 9990      |
|                     | Sarcoma of the lung and trachea                                 | C33-C34                                    | 8710-8711, 8714, 8800-8831, 8840-8850, 8852-8921, 8935, 8963-8964, 8990-8991, 9040-9044, 9120-9133, 9137, 9150-9170, 9180-9261, 9364-9365, 9540-9581                  |
|                     | Soft tissue sarcoma of the abdomen, retroperitoneum, and pelvis | C47.4-5, C49.4-5, C48.0                    | 8000-8005, 8710-8711, 8714, 8800-8831, 8840-8850, 8852-8921, 8935, 8963-8964, 8980-8982, 8990-8991, 9040-9044, 9137, 9150-9170, 9180-9261, 9364-9365, 9540-9581, 9990 |

## Supplemental Table 1 (continued)

|                        |                                                                 |                                       |                                                                                                                                                                                  |
|------------------------|-----------------------------------------------------------------|---------------------------------------|----------------------------------------------------------------------------------------------------------------------------------------------------------------------------------|
| Soft-tissue sarcoma    | Soft tissue sarcoma of the abdomen, retroperitoneum, and pelvis | C74                                   | 8710-8711, 8714, 8800-8831, 8840-8850, 8852-8921, 8935, 8963-8964, 8980-8982, 8990-8991, 9040-9044, 9137, 9150-9170, 9180-9261, 9364-9365, 9540-9581                             |
|                        | Soft tissue sarcoma of the abdomen, retroperitoneum, and pelvis | C42.2, C49.4-5, C48.0, C74            | 9120-9133                                                                                                                                                                        |
|                        | Soft tissue sarcoma - other/NOS                                 | C44.5, C44.8-9, C47.6-9, C49.6-9, C80 | 8000-8005, 8710-8711, 8714, 8800-8831, 8840-8850, 8852-8921, 8935, 8963-8964, 8980-8982, 8990-8991, 9040-9044, 9120-9133, 9137, 9150-9170, 9180-9261, 9364-9365, 9540-9581, 9990 |
| Non-Hodgkin lymphoma   | Follicular lymphoma                                             | all                                   | 9690-9696, 9615, 9623, 9633                                                                                                                                                      |
|                        | Lymphoplasmacytic lymphoma / Waldenström macroglobulinemia      | all                                   | 9761, 97611                                                                                                                                                                      |
|                        | Indolent NHL, other/NOS                                         | all                                   | 9689, 9711, 9764                                                                                                                                                                 |
|                        | Hairy cell leukemia                                             | all                                   | 9940, 9941                                                                                                                                                                       |
|                        | B-PLL                                                           | all                                   | 9825, 9832, 9833, 9631                                                                                                                                                           |
|                        | Mantle cell lymphoma                                            | all                                   | 9673, 9621, 9672                                                                                                                                                                 |
|                        | Burkitt lymphoma/leukemia                                       | all                                   | 9687, 9826                                                                                                                                                                       |
| Multiple myeloma       | Multiple myeloma                                                | all                                   | 9730, 9732                                                                                                                                                                       |
| Acute myeloid leukemia | AML with specific cytogenetic abnormalities                     | all                                   | 9865-9866, 9869, 9871, 9877-9879, 9896-9897, 9911, 9912                                                                                                                          |
|                        | AML with myelodysplasia-related changes                         | all                                   | 9895, 9984                                                                                                                                                                       |
|                        | Therapy-related myeloid neoplasms                               | all                                   | 9920, 9987                                                                                                                                                                       |
|                        | AML, other/NOS                                                  | all                                   | 9840-9841, 9861, 9864, 9867, 9870, 9872-9874, 9890-9891, 9910, 9931-9932                                                                                                         |
|                        | Myeloid sarcoma                                                 | all                                   | 9930                                                                                                                                                                             |
|                        | Myeloid leukemia associated with Down syndrome                  | all                                   | 9898                                                                                                                                                                             |
|                        | Blastic plasmacytoid dendritic cell neoplasm                    | all                                   | 9727                                                                                                                                                                             |

## Supplemental Table 1 (continued)

|                               |                                                                                               |          |                                                                         |
|-------------------------------|-----------------------------------------------------------------------------------------------|----------|-------------------------------------------------------------------------|
|                               | Chronic myeloid leukemia                                                                      | all      | 9863, 9875                                                              |
|                               | Mast cell tumors                                                                              | all      | 9740-9742, 9900                                                         |
|                               | Myelofibrosis                                                                                 | all      | 9961                                                                    |
| Myeloproliferative neoplasms* | Myeloid and lymphoid neoplasms with eosinophilia and abnormalities of PDGFRA, PDGFRB or FGFR1 | all      | 9965-9967, 9963-9964, 9968, 9880                                        |
|                               | Myeloproliferative neoplasms, other/NOS                                                       | all      | 9842, 9950, 9960, 9962                                                  |
| Myelodysplastic syndrome*     | Myelodysplastic syndrome                                                                      | all      | 9980, 9982-9983, 9985-9986, 9989, 9991-9993                             |
| Primary site unknown          | Other/unspecified sites                                                                       | C76, C39 | 8000-8576, 8980, 8982, 9110, 9990                                       |
|                               | Primary site unknown                                                                          | C80      | 8000-8148, 8154, 8160-8231, 8243-8246, 8250-8576, 8980-8982, 9110, 9990 |

\*Information on myeloproliferative neoplasms and myelodysplastic syndromes is available as of 2001 since the WHO first recognized these entities in the WHO 2001 classification as malignant disorders. Abbreviations: AML, acute myeloid leukemia; NHL, non-Hodgkin lymphoma; NOS, not otherwise specified; PLL, prolymphocytic leukemia; WHO, World Health Organization.

## Supplemental Table 2

**Supplemental Table 2.** Standardized incidence ratios and absolute excess risk of all SPMs and SPM subtypes according to the calendar period

| Type of SPM                     | 1989-1995 |                         |        | 1995-2002 |                         |        | 2003-2009 |                         |        | 2010-2019 |                         |        |
|---------------------------------|-----------|-------------------------|--------|-----------|-------------------------|--------|-----------|-------------------------|--------|-----------|-------------------------|--------|
|                                 | Obs       | SIR (95%CI)             | AER    | Obs       | SIR (95%CI)             | AER    | Obs       | SIR (95%CI)             | AER    | Obs       | SIR (95%CI)             | AER    |
| All sites                       | 711       | <b>1.65 (1.53-1.77)</b> | 119.23 | 1,007     | <b>1.60 (1.51-1.71)</b> | 114.59 | 1,507     | <b>1.71 (1.62-1.80)</b> | 143.08 | 1,145     | <b>1.56 (1.47-1.66)</b> | 116.72 |
| Any solid cancer                | 687       | <b>1.66 (1.54-1.79)</b> | 116.01 | 985       | <b>1.65 (1.54-1.75)</b> | 116.41 | 1,453     | <b>1.73 (1.64-1.82)</b> | 139    | 1,099     | <b>1.57 (1.48-1.66)</b> | 111.96 |
| Oral cavity or pharynx          | 4         | 0.56 (0.15-1.43)        | -1.21  | 15        | 1.33 (0.75-2.20)        | 1.01   | 23        | 1.39 (0.88-2.09)        | 1.31   | 12        | 0.88 (0.45-1.54)        | -0.42  |
| Gastrointestinal tract          |           |                         |        |           |                         |        |           |                         |        |           |                         |        |
| Esophagus                       | 10        | 1.10 (0.53-2.02)        | 0.33   | 11        | 0.72 (0.36-1.28)        | -1.17  | 29        | 1.24 (0.83-1.78)        | 1.12   | 17        | 0.87 (0.51-1.40)        | -0.64  |
| Stomach                         | 25        | 1.43 (0.92-2.11)        | 2.86   | 27        | 1.40 (0.92-2.03)        | 2.05   | 24        | 1.11 (0.71-1.65)        | 0.48   | 11        | 0.78 (0.39-1.40)        | -0.79  |
| Colon and rectum                | 85        | 1.18 (0.94-1.46)        | 4.97   | 123       | 1.15 (0.96-1.38)        | 4.47   | 205       | <b>1.37 (1.19-1.58)</b> | 11.43  | 120       | 1.06 (0.88-1.27)        | 1.73   |
| Pancreas                        | 24        | <b>1.97 (1.26-2.93)</b> | 4.51   | 15        | 0.87 (0.49-1.44)        | -0.59  | 19        | 0.77 (0.46-1.20)        | -1.16  | 26        | 1.30 (0.85-1.90)        | 1.54   |
| Lower respiratory system        |           |                         |        |           |                         |        |           |                         |        |           |                         |        |
| Larynx                          | 5         | 1.05 (0.34-2.44)        | 0.08   | 11        | 1.74 (0.87-3.11)        | 1.25   | 12        | 1.52 (0.78-2.65)        | 0.82   | 2         | 0.35 (0.04-1.25)        | -0.98  |
| Lung or bronchus                | 111       | <b>1.48 (1.22-1.78)</b> | 13.76  | 149       | <b>1.45 (1.23-1.70)</b> | 12.46  | 186       | <b>1.35 (1.16-1.56)</b> | 9.77   | 127       | 1.19 (0.99-1.42)        | 5.30   |
| Skin                            |           |                         |        |           |                         |        |           |                         |        |           |                         |        |
| Melanoma                        | 38        | <b>3.79 (2.68-5.20)</b> | 10.75  | 53        | <b>2.61 (1.96-3.42)</b> | 8.84   | 100       | <b>2.76 (2.24-3.35)</b> | 12.97  | 87        | <b>2.50 (2.00-3.08)</b> | 13.56  |
| Squamous cell                   | 196       | <b>5.71 (4.94-6.56)</b> | 63.69  | 339       | <b>5.46 (4.90-6.07)</b> | 77.08  | 532       | <b>4.91 (4.50-5.34)</b> | 88.81  | 420       | <b>4.04 (3.66-4.44)</b> | 83.84  |
| Breast                          | 43        | 0.96 (0.70-1.30)        | -0.62  | 67        | 1.10 (0.86-1.40)        | 1.73   | 91        | 1.16 (0.94-1.43)        | 2.60   | 58        | 0.97 (0.74-1.25)        | -0.47  |
| Female genital organ            |           |                         |        |           |                         |        |           |                         |        |           |                         |        |
| Endometrium                     | 5         | 0.65 (0.21-1.51)        | -1.04  | 16        | 1.54 (0.88-2.51)        | 1.52   | 10        | 0.75 (0.36-1.38)        | -0.67  | 12        | 1.21 (0.63-2.12)        | 0.55   |
| Ovary                           | 4         | 0.63 (0.17-1.60)        | -0.91  | 9         | 1.22 (0.56-2.31)        | 0.43   | 7         | 0.79 (0.32-1.62)        | -0.38  | 8         | 1.27 (0.55-2.50)        | 0.44   |
| Male genital organ              |           |                         |        |           |                         |        |           |                         |        |           |                         |        |
| Prostate                        | 75        | 1.12 (0.88-1.41)        | 3.16   | 112       | 1.08 (0.89-1.30)        | 2.33   | 159       | 1.08 (0.92-1.26)        | 2.35   | 130       | 1.12 (0.93-1.33)        | 3.60   |
| Urinary tract                   |           |                         |        |           |                         |        |           |                         |        |           |                         |        |
| Urinary bladder or renal pelvis | 26        | 1.13 (0.71-1.66)        | 1.17   | 34        | 1.05 (0.72-1.46)        | 0.41   | 57        | 1.31 (0.99-1.70)        | 2.74   | 35        | 1.08 (0.75-1.50)        | 0.63   |
| Kidney                          | 18        | <b>1.71 (1.01-2.70)</b> | 2.85   | 26        | <b>1.62 (1.06-2.37)</b> | 2.68   | 49        | <b>2.09 (1.55-2.76)</b> | 5.18   | 27        | 1.41 (0.93-2.05)        | 2.05   |
| Brain                           | 9         | 2.17 (0.99-4.12)        | 1.85   | 7         | 1.10 (0.44-2.26)        | 0.17   | 14        | 1.56 (0.85-2.61)        | 1.01   | 6         | 0.84 (0.31-1.83)        | -0.29  |
| Thyroid gland                   | 1         | 0.78 (0.02-4.35)        | -0.11  | 2         | 1.04 (0.13-3.77)        | 0.02   | 5         | 1.76 (0.57-4.12)        | 0.44   | 10        | <b>4.08 (1.96-7.51)</b> | 1.95   |



## Supplemental Table 2 (continued)

|                                         |    |             |                    |       |    |             |                    |       |    |             |                    |       |    |             |                  |       |
|-----------------------------------------|----|-------------|--------------------|-------|----|-------------|--------------------|-------|----|-------------|--------------------|-------|----|-------------|------------------|-------|
| Soft-tissue sarcoma                     | 8  | <b>2.88</b> | <b>(1.20-5.68)</b> | 1.99  | 8  | <b>2.08</b> | <b>(0.90-4.10)</b> | 1.12  | 17 | <b>3.20</b> | <b>(1.86-5.12)</b> | 2.36  | 6  | 1.37        | (0.50-2.99)      | 0.42  |
| Primary site unknown                    | 36 | <b>1.76</b> | <b>(1.23-2.44)</b> | 5.93  | 42 | <b>1.82</b> | <b>(1.31-2.46)</b> | 5.08  | 37 | <b>1.69</b> | <b>(1.19-2.34)</b> | 3.06  | 14 | 1.16        | (0.63-1.94)      | 0.50  |
| Blood, bone marrow, or lymphatic system |    |             |                    |       |    |             |                    |       |    |             |                    |       |    |             |                  |       |
| Any hematological cancer                | 31 | 1.41        | (0.96-2.00)        | 3.45  | 37 | 1.38        | (1.38-0.71)        | 0.02  | 85 | <b>1.55</b> | <b>(1.24-1.91)</b> | 6.11  | 71 | <b>1.63</b> | <b>1.27-2.05</b> | 7.13  |
| Non-Hodgkin lymphoma                    | 16 | <b>2.33</b> | <b>(1.33-3.78)</b> | 3.49  | 11 | 1.10        | (0.55-1.97)        | 0.27  | 22 | 1.54        | (0.96-2.33)        | 1.55  | 10 | 0.83        | 0.40-1.53        | -0.53 |
| Multiple myeloma                        | 3  | 0.46        | (0.10-1.36)        | -1.32 | 5  | 0.54        | (0.18-1.27)        | -1.13 | 12 | 0.93        | (0.48-1.62)        | -0.19 | 20 | 1.56        | 0.99-3.03        | 2.54  |
| Acute myeloid leukemia                  | 6  | 1.76        | (0.65-3.83)        | 0.99  | 10 | 2.02        | (0.97-3.72)        | 1.36  | 25 | <b>3.72</b> | <b>(2.41-5.49)</b> | 3.69  | 15 | <b>2.85</b> | <b>1.59-4.69</b> | 2.51  |
| Myeloproliferative neoplasm             | 1  | 0.43        | (0.01-2.42)        | -0.50 | 2  | 0.36        | (0.04-1.31)        | -0.94 | 6  | 0.62        | (0.23-1.35)        | -0.73 | 8  | 0.98        | 0.42-1.94        | -0.04 |
| Myelodysplastic syndromes               | 2  | 0.88        | (0.11-3.17)        | -0.11 | 2  | 0.31        | (0.04-1.13)        | -1.17 | 14 | 1.37        | (0.75-2.31)        | 0.77  | 17 | <b>2.35</b> | <b>1.37-3.77</b> | 2.53  |

Statically significant SIRs are depicted in bold.

Abbreviations: AER, absolute excess risk; CI, confidence interval; SIR, absolute excess risk; and Obs, observed.

## Supplemental Table S3

**Supplemental Table S3.** The spectrum of SPM development according per treatment category, 2014-2019

| Treatment       | n per treatment category | n of developed SPMs | SPM category†                    | n per SPM category |
|-----------------|--------------------------|---------------------|----------------------------------|--------------------|
| FCR             | 207                      | 23                  | Squamous cell skin               | 9                  |
|                 |                          |                     | Lung and bronchus                | 6                  |
|                 |                          |                     | Acute myeloid leukemia           | 2                  |
|                 |                          |                     | Prostate                         | 2                  |
|                 |                          |                     | Colon and rectum                 | 1                  |
|                 |                          |                     | Breast                           | 1                  |
|                 |                          |                     | Melanoma skin                    | 1                  |
|                 |                          |                     | Urinary bladder and renal pelvis | 1                  |
| R or O-Clb      | 199                      | 24                  | Squamous cell skin               | 18                 |
|                 |                          |                     | Colon and rectum                 | 3                  |
|                 |                          |                     | Lung and bronchus                | 3                  |
|                 |                          |                     | Melanoma skin                    | 2                  |
|                 |                          |                     | Oral cavity and pharynx          | 1                  |
|                 |                          |                     | Stomach                          | 1                  |
|                 |                          |                     | Prostate                         | 1                  |
|                 |                          |                     | Urinary bladder and renal pelvis | 1                  |
|                 |                          |                     | Kidney                           | 1                  |
|                 |                          |                     | Multiple myeloma                 | 1                  |
|                 |                          |                     | Myelodysplastic syndrome         | 1                  |
| Clb monotherapy | 79                       | 3                   | Squamous cell skin               | 2                  |
|                 |                          |                     | Colon and rectum                 | 1                  |
| R-CVP           | 75                       | 10                  | Squamous cell skin               | 2                  |
|                 |                          |                     | Lung and bronchus                | 2                  |
|                 |                          |                     | Acute myeloid leukemia           | 1                  |
|                 |                          |                     | Breast                           | 1                  |
|                 |                          |                     | Melanoma skin                    | 1                  |
|                 |                          |                     | Myelodysplastic syndrome         | 1                  |
|                 |                          |                     | Primary site unknown             | 1                  |
|                 |                          |                     | Prostate                         | 1                  |
| BR              | 70                       | 11                  | Squamous cell skin               | 8                  |
|                 |                          |                     | Prostate                         | 2                  |
|                 |                          |                     | Colon and rectum                 | 1                  |
| Other*          | 67                       | 6                   | Squamous cell skin               | 3                  |
|                 |                          |                     | Acute myeloid leukemia           | 1                  |
|                 |                          |                     | Esophagus                        | 1                  |
| Venetoclax      | 34                       | 1                   | Myelodysplastic syndrome         | 1                  |
|                 |                          |                     | Squamous cell skin               | 1                  |
| Ibrutinib       | 27                       | 1                   | Prostate                         | 1                  |

\*The other treatment category consisted of rituximab plus prednisone or methotrexate (n=50), R-CHOP (n=11), fludarabine monotherapy (n=3), FC (n=1), bendamustine monotherapy (n=1) and R-idelalisib (n=1).

Abbreviations: BR, bendamustine and rituximab; Clb, chlorambucil, FC, fludarabine and cyclophosphamide; FCR, fludarabine, cyclophosphamide and rituximab; n, number; R-CHOP, rituximab, cyclophosphamide, doxorubicin, vincristine and prednisone; R-CVP, rituximab, cyclophosphamide, vincristine, and prednisone; R or O-Clb, rituximab or obinutuzumab with chlorambucil; ICD-code, International Classification of Diseases for Oncology code.

## **Supplemental Figure legends**

**Supplemental Figure 1. Cumulative incidence (one minus Kaplan-Meier estimate) of subtypes of second primary malignancies among patients with chronic lymphocytic leukemia and the general Dutch population.** Solid blue lines represent the observed incidence in patients with chronic lymphocytic leukemia, and the dashed pink lines the expected incidence in the general population. Please note the alternative Y-scale for squamous cell carcinomas of the skin.

**Supplemental Figure 2. Standardized incidence ratios (A) and absolute excess risk (B) of all second primary malignancies among patients with chronic lymphocytic leukemia according to the latency time.** The standardized incidence ratio (SIRs) compares the observed cancer incidence among the studied cohort with the expected cancer incidence in an age-, sex- and period-matched group from the general population. The absolute excess risk (AER) represents the additional cancer risk among patients with chronic lymphocytic leukemia compared to the general population. The overall SIR and AER are depicted as a diamond, and the individual SIR and AER circles are scaled according to their magnitude. The statistically significant SIRs and AER are presented in bold, and the vertical lines depict the 95% confidence interval.

**Supplemental Figure 3. Standardized incidence ratios (A) and absolute excess risk (B) of all site second primary malignancies among patients with chronic lymphocytic leukemia according to the age categories.** The standardized incidence ratio (SIRs) compares the observed cancer incidence among the studied cohort with the expected cancer incidence in an age-, sex- and period-matched group from the general population. The absolute excess risk (AER) represents the additional cancer risk among patients with chronic lymphocytic leukemia compared to the general population. The overall SIR and AER are depicted as a diamond, and the individual SIR and AER circles are scaled according to their magnitude. The statistically significant SIRs and AER are presented in bold, and the vertical lines depict the 95% confidence interval.

# Supplemental Figure 1

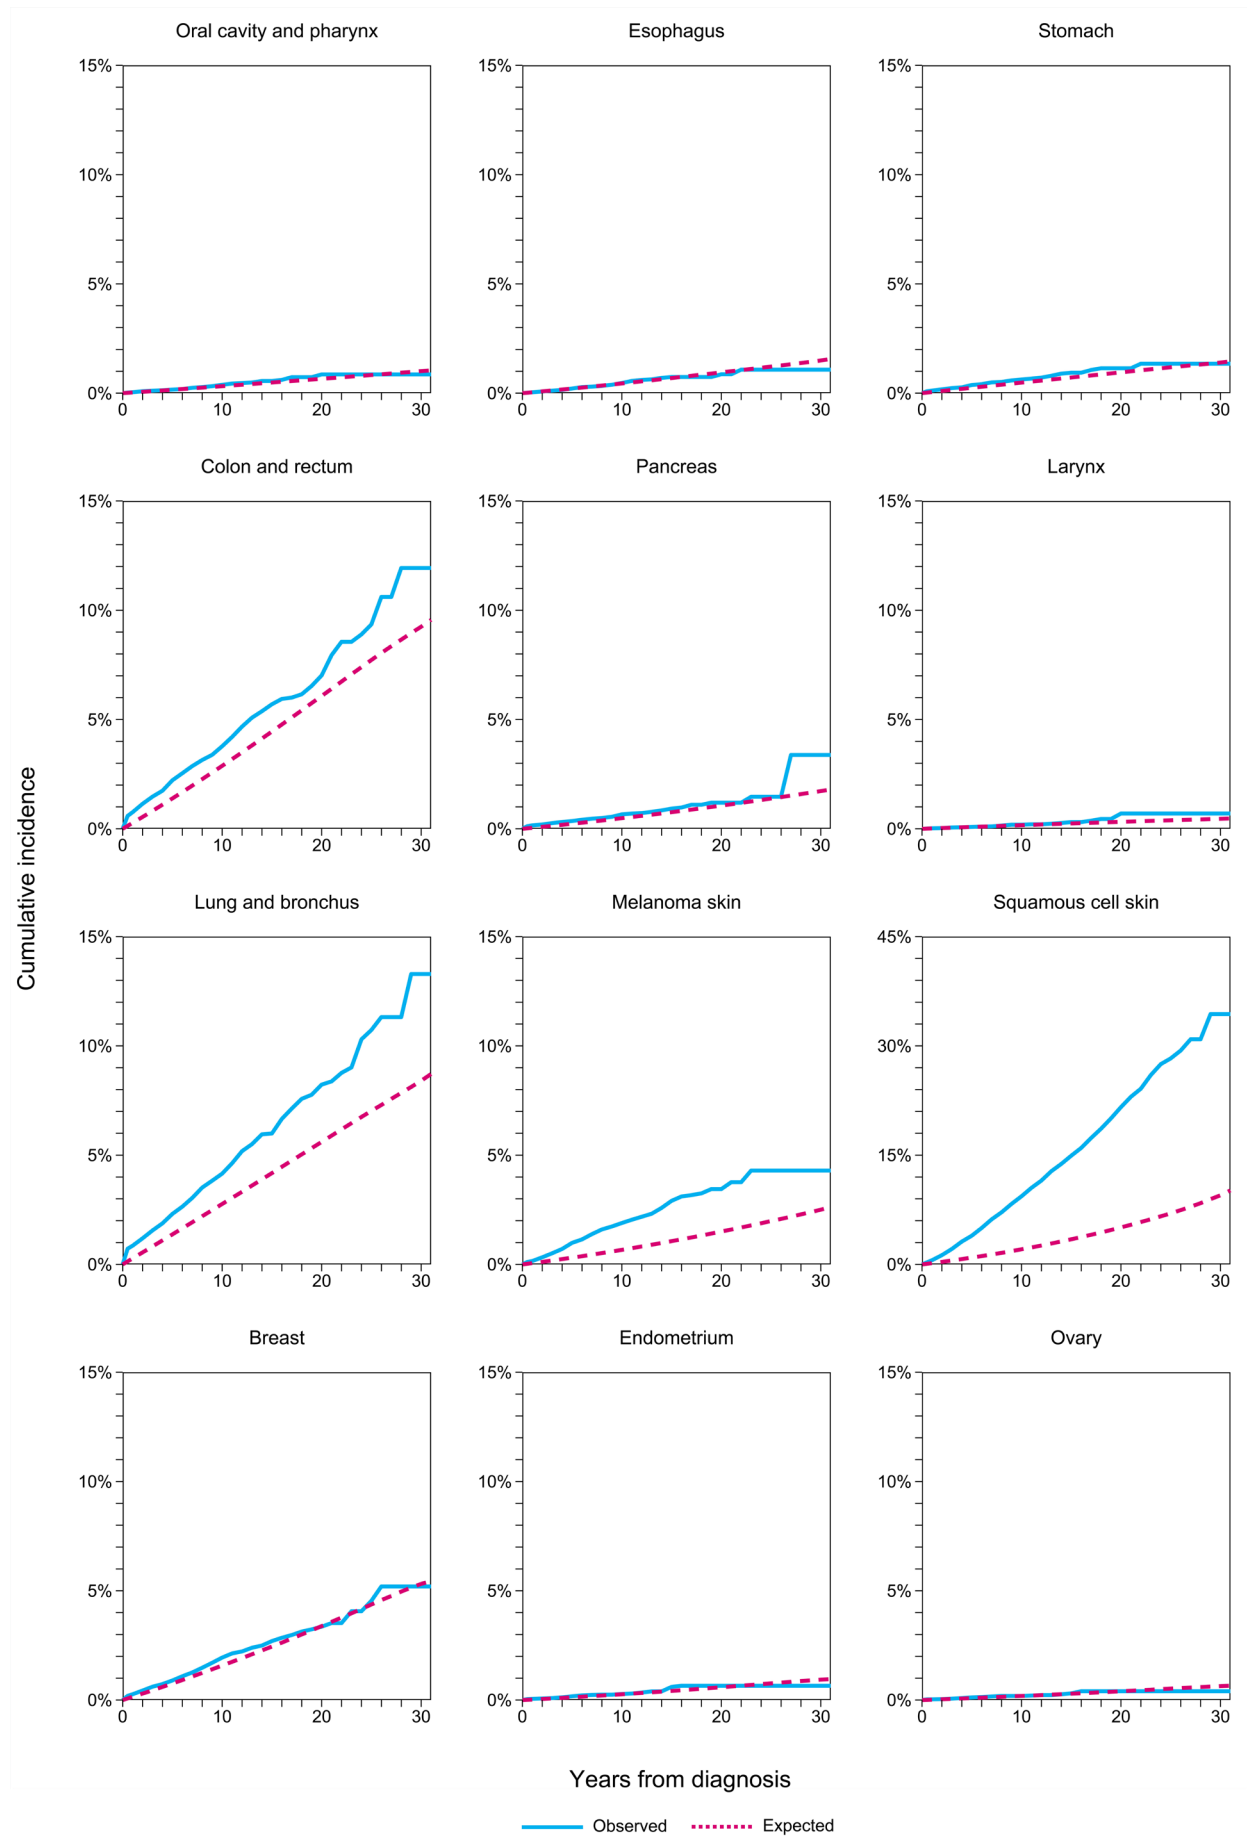

# Supplemental Figure 1 (continues)

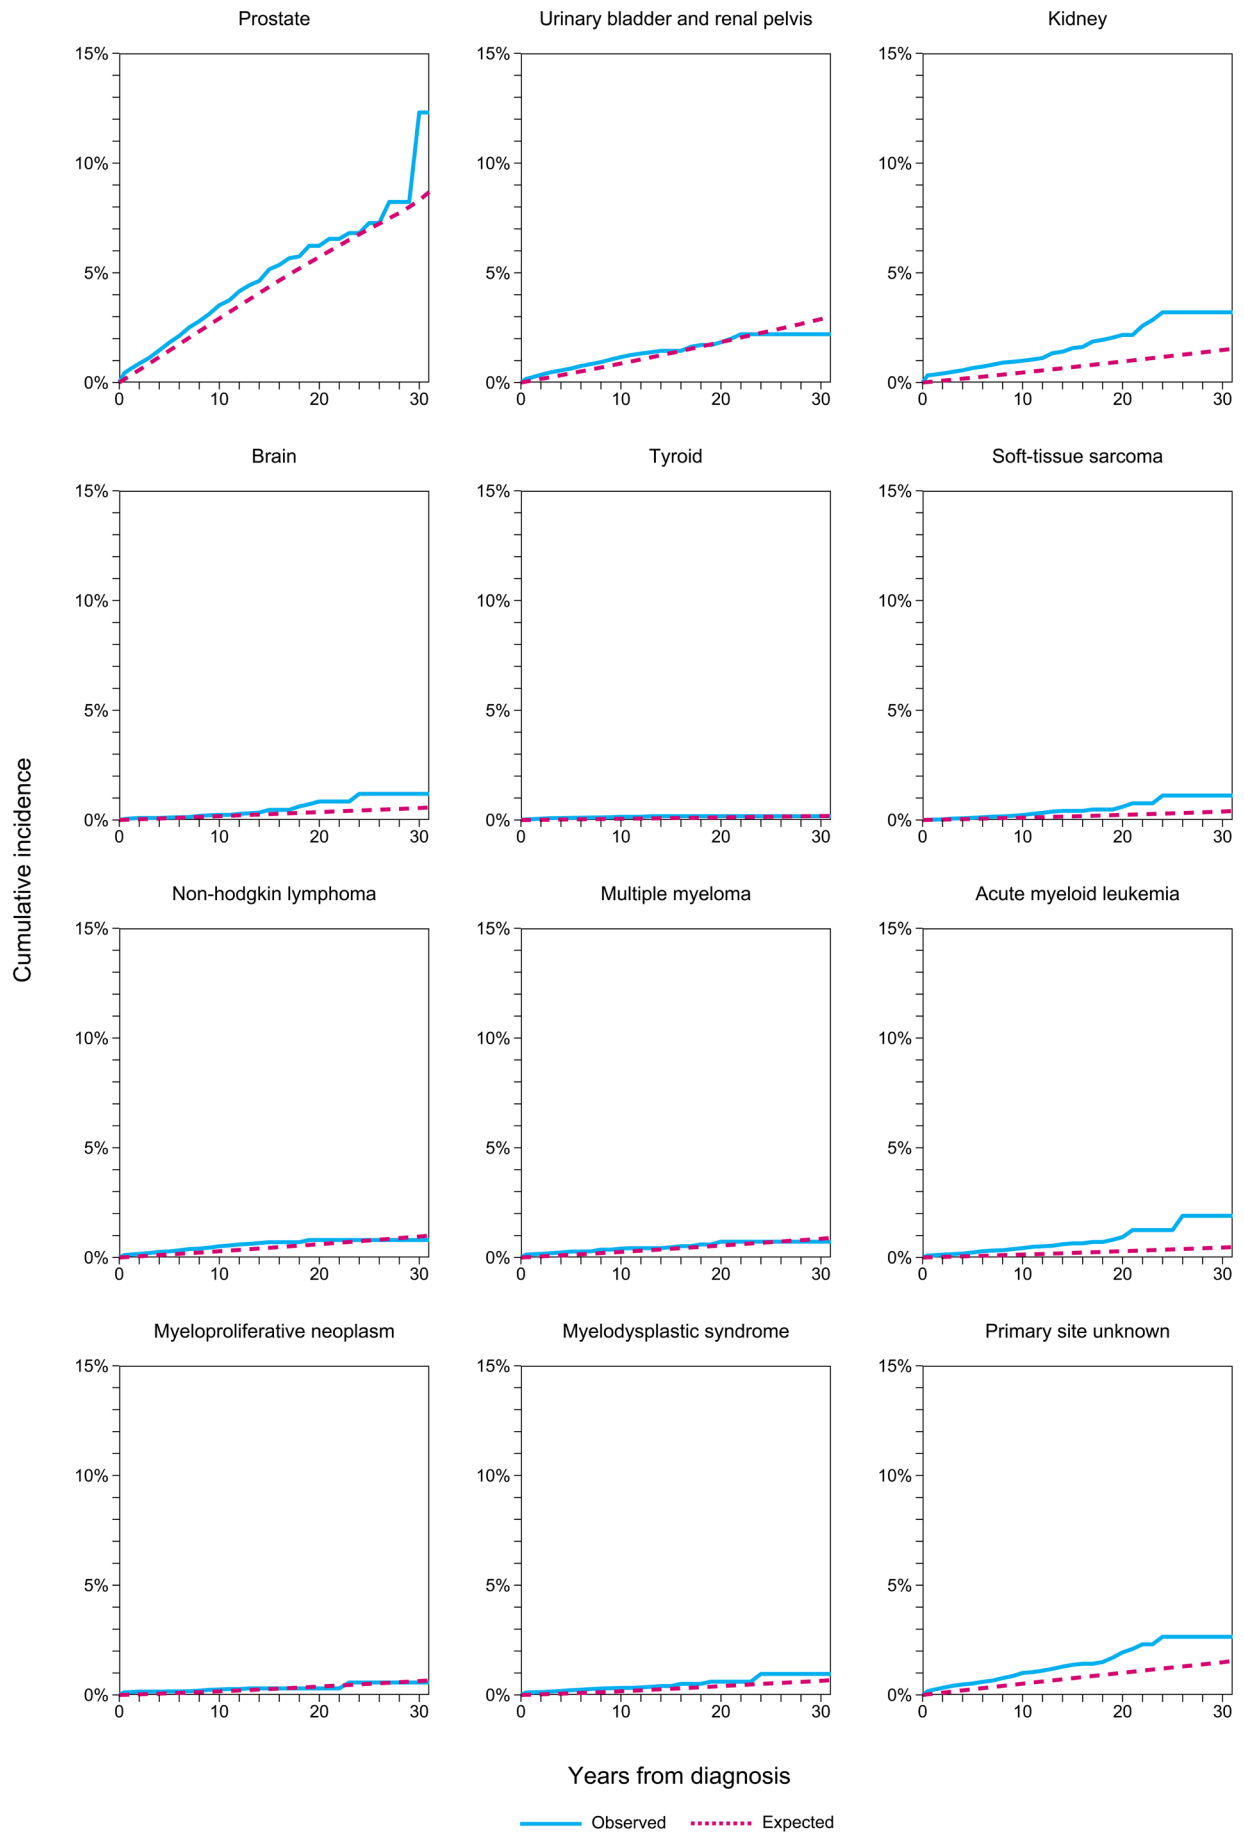

Supplemental Figure 2

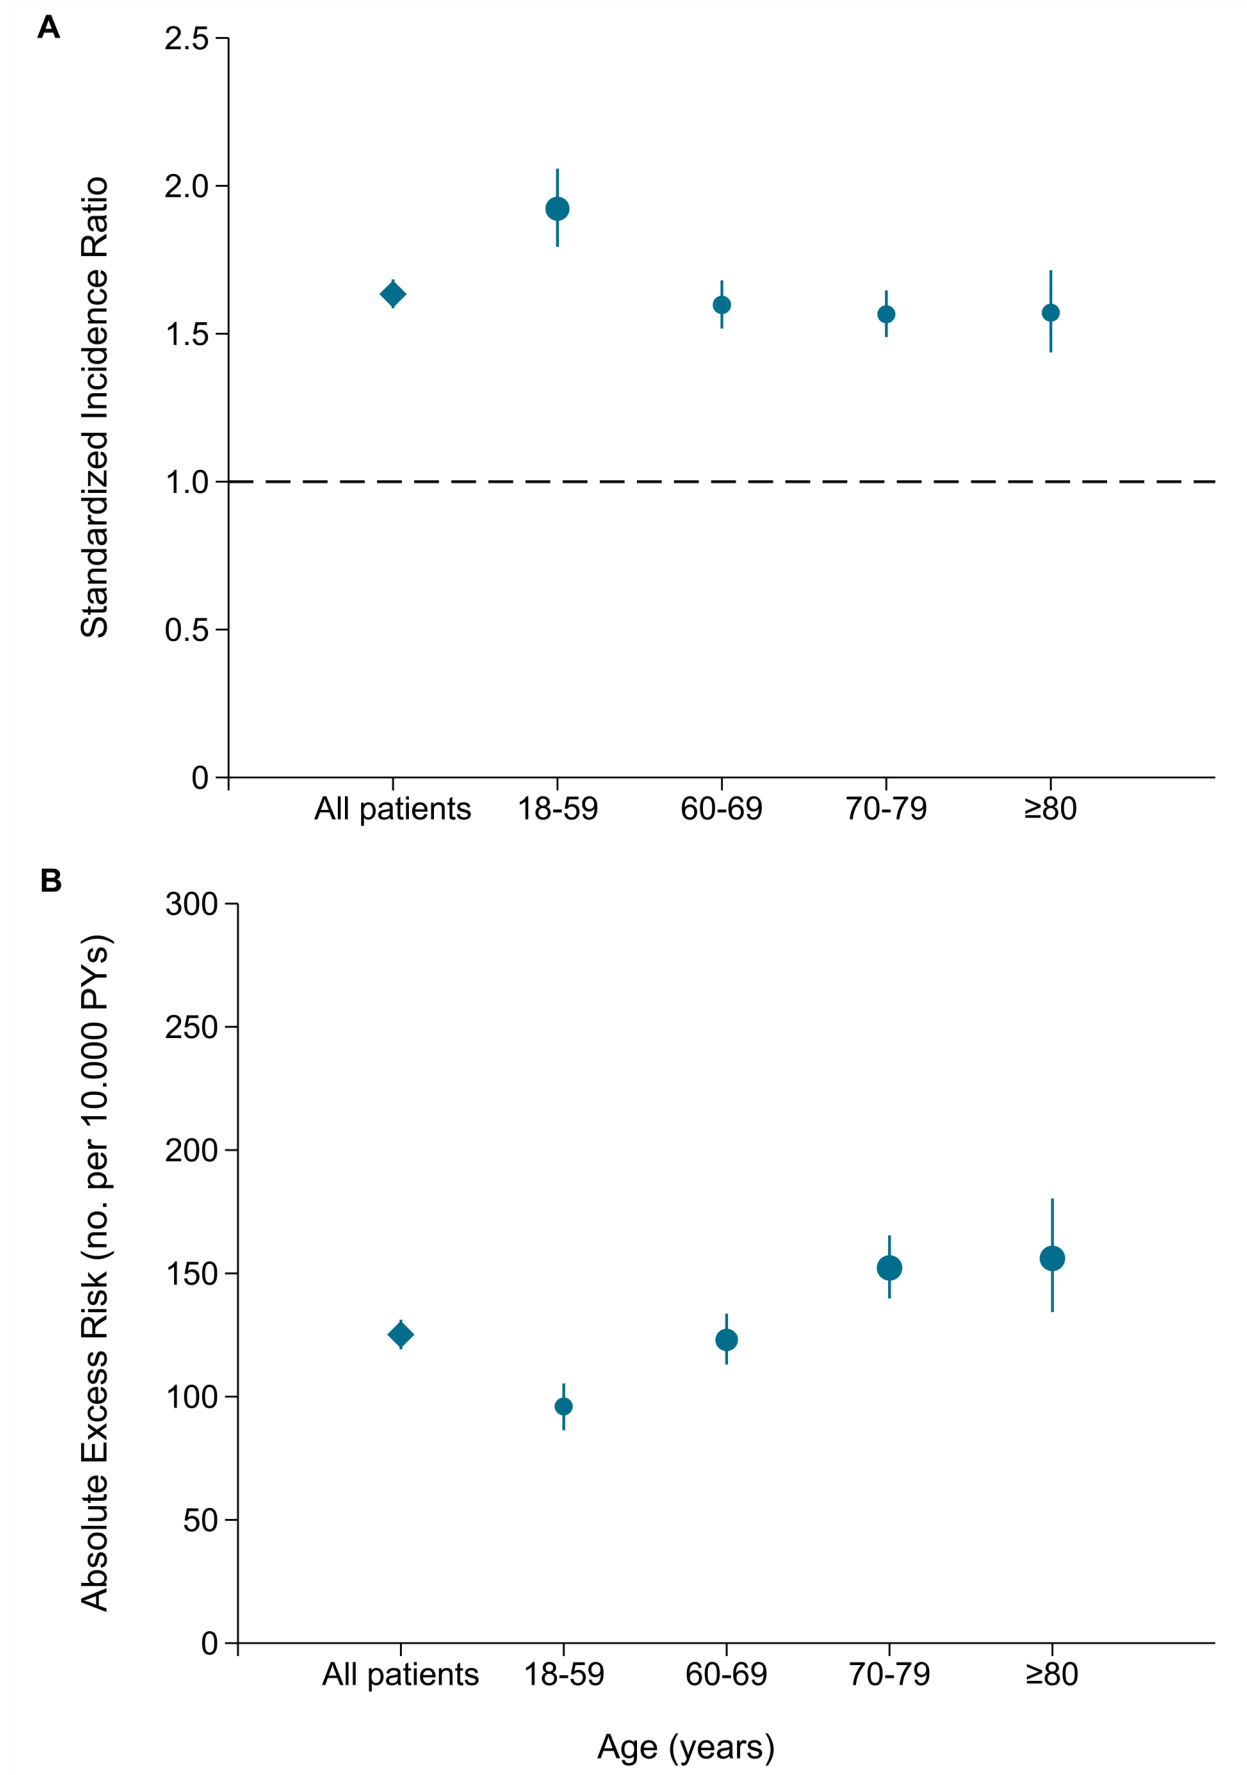

Supplemental Figure 3

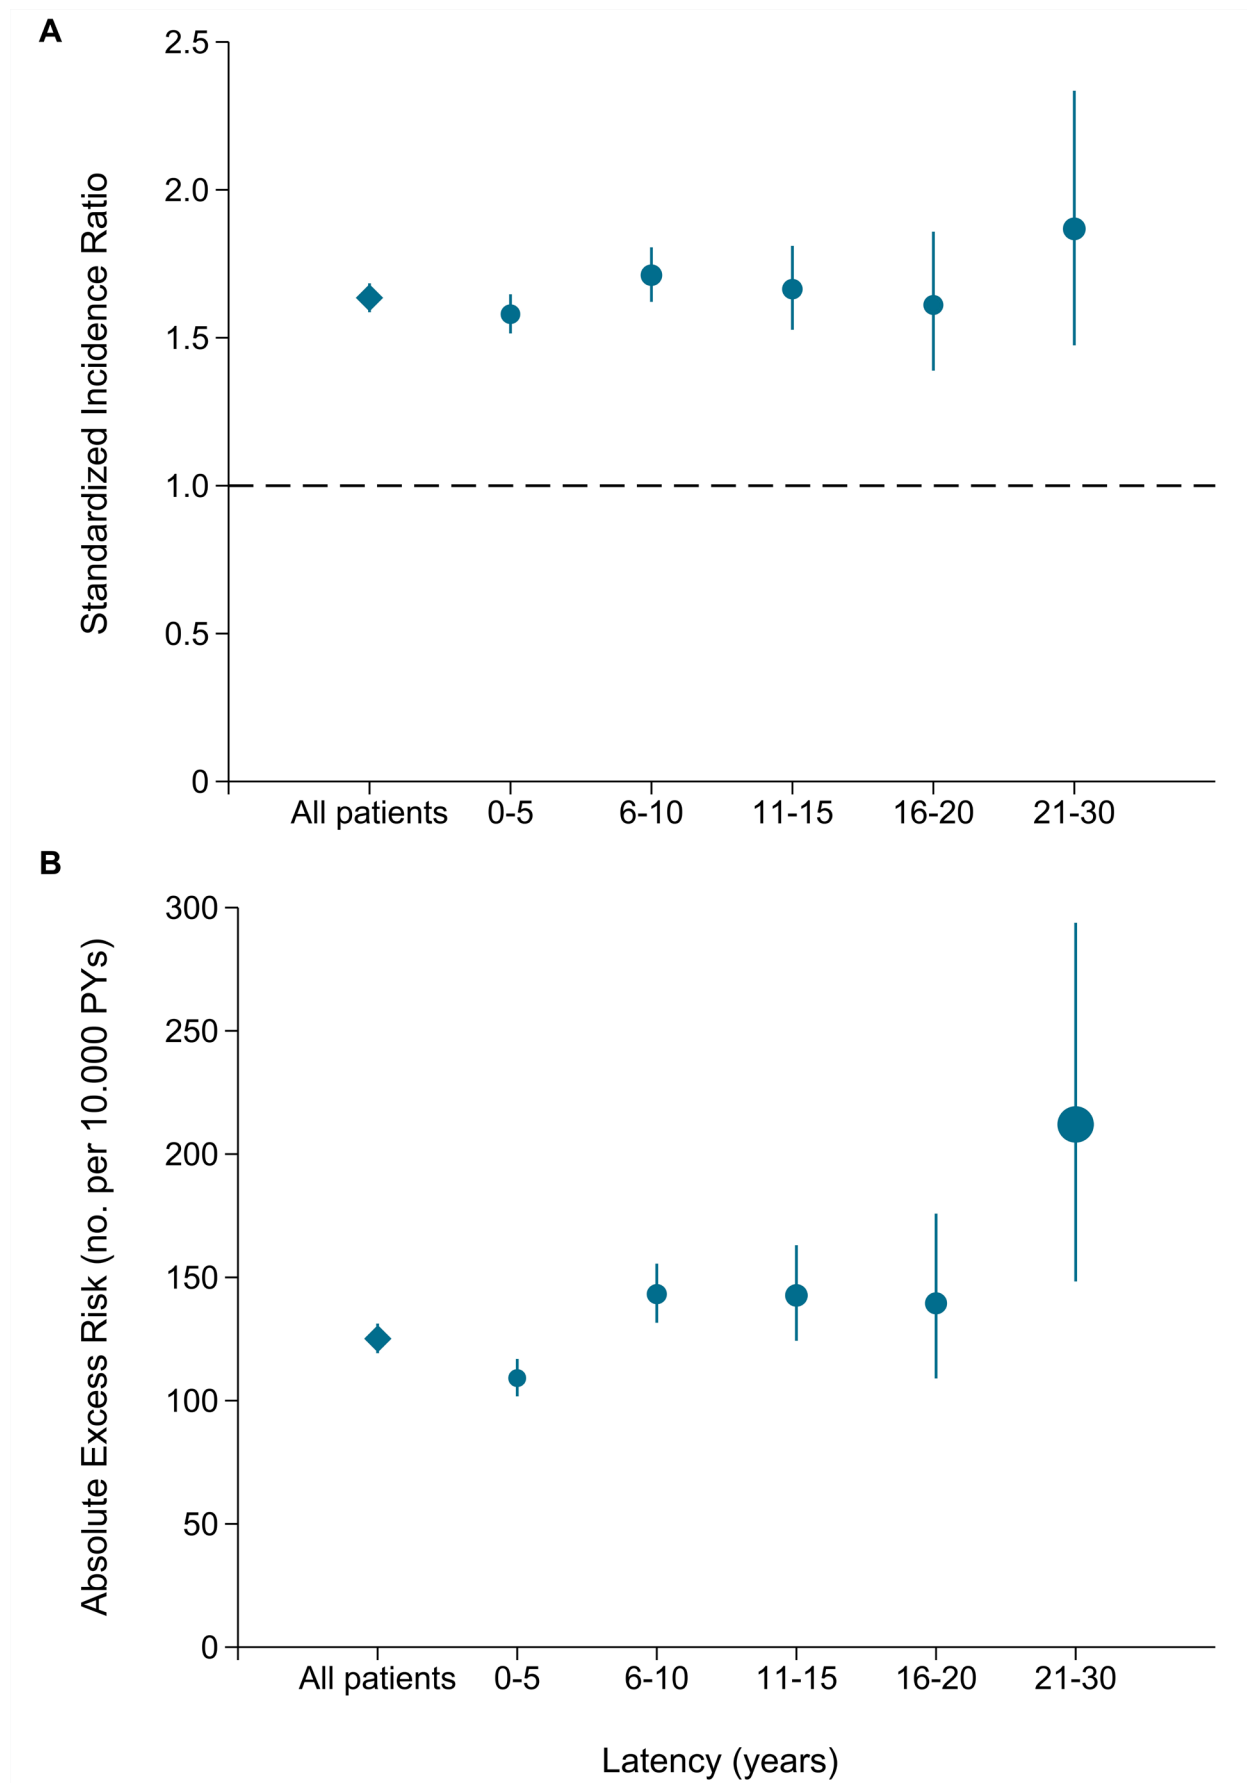

Supplement: 41408_2023_784_MOESM1_ESM.pdf [file 41408_2023_784_MOESM1_ESM.pdf]
